# Supplementary material
Source: publisher site journal article supplement (https://www.dovepress.com/article/562937)
Supplement: Supplementary file 1 [file 562937_appendix.docx]

**Supplementary Table 1** Comparison of PPCs incidence on postoperative days 1, 3, and 7.

| Time | Group C（n=44） | Group D（n=44） | Group B（n=44） | Group DB（n=44） | *P* |
| --- | --- | --- | --- | --- | --- |
| Day1 | 17（38.6%） | 11（25%） | 9（20.5%） | 6（13.6%） | 0.046a |
| Day3 | 15（34.1%） | 7（15.9%） | 5（11.4%） | 5（11.4%） | 0.016a |
| Day7 | 2（4.5%） | 0 | 2（4.5%） | 1（2.3%） | 0.757 |

**Notes:** Values are presented as number of patients (%). Group C, control group; Group D, dexmedetomidine group; Group B, butorphanol group; Group DB, dexmedetomidine + butorphanol group. a, *P*＜0.05(Pairwise comparison).

**Supplementary Table 2** Comparison of other postoperative complications on postoperative days 1, 3, and 7.

| postoperative complications | Group C（n=44） | Group D（n=44） | Group B（n=44） | Group DB（n=44） | *P* |
| --- | --- | --- | --- | --- | --- |
| subcutaneous emphysema | 2（4.5%） | 2（4.5%） | 2（4.5%） | 1（2.3%） | 1 |
| PONV | 20（45.5%） | 10（22.7%） | 6（13.6%） | 11（25.0%） | 0.003a |
| postoperative shivering | 4（9.1%） | 0 | 2（4.5%） | 1（2.3%） | 0.757 |
| Postoperative salvage analgesia | 16（36.4%） | 12（27.3%） | 13（29.5%） | 11（25.0%） | 0.357 |
| EA | 2（4.5%） | 0 | 0 | 0 | 0.076 |

**Notes:** Values are presented as number of patients (%). Group C, control group; Group D, dexmedetomidine group; Group B, butorphanol group; Group DB, dexmedetomidine + butorphanol group. a, *P*＜0.05(Pairwise comparison).

**Abbreviations:** PONV, postoperative nausea and vomiting; EA, emergence agitation.

**Supplementary Table3** Comparison of QoR-15 scores on postoperative days 1, 3, and 7.

| Time | Group C（n=44） | Group D（n=44） | Group B（n=44） | Group DB（n=44） | *P* |
| --- | --- | --- | --- | --- | --- |
| Day1 | 105(16) | 107.00(10) | 116.50(13) | 107.50(21) | 0.001a |
| Day3 | 119.00(16) | 121.00(20) | 134.50(21) | 114.00(26) | ＜0.001 a |
| Day7 | 132.00(19) | 134.50(12) | 143.50(8) | 132(21) | ＜0.001 a |

**Notes:** Values are presented as median (interquartile range). Group C, control group; Group D, dexmedetomidine group; Group B, butorphanol group; Group DB, dexmedetomidine + butorphanol group. a, P＜0.05(Pairwise comparison).

**Supplementary Table 4** Comparison of inflammatory factor levels among four groups

| inflammatory factors | Group C（n=44） | Group D（n=44） | Group B（n=44） | Group DB（n=44） | *P* |
| --- | --- | --- | --- | --- | --- |
| IL-6 | 13.34±7.49 | 9.82±7.19 | 11.41±7.12 | 9.00±6.71 | 0.031a |
| IL-8 | 6.69±4.12 | 5.42±4.11 | 6.51±4.11 | 5.1±4.44 | 0.171 |
| IL-10 | 2.35±1.31 | 2.18±1.38 | 2.63±2.14 | 1.72±1.91 | 0.096 |
| TNF-α | 1.42±0.74 | 1.12±0.58 | 1.20±1.11 | 0.84±0.96 | 0.204 |
| PCT | 0.49±0.37 | 0.54±0.39 | 0.57±0.46 | 0.62±0.49 | 0.550 |

**Notes:** Values are presented as mean±SD. Group C, control group; Group D, dexmedetomidine group; Group B, butorphanol group; Group DB, dexmedetomidine + butorphanol group. a, P＜0.05(Pairwise comparison).

**Abbreviations:** IL, Interleukin; TNF-α, Tumor necrosis factor-α; PCT, procalcitonin.
